# 1 Sexual Gender-Based Violence among Adolescent Girls and Young Women 2 during COVID-19 Pandemic, Mid-Eastern Uganda

3 Patience Mwine<sup>1,3\*</sup>, Benon Kwesiga<sup>1,2</sup>, Richard Migisha<sup>1,2</sup>, Juliet Cheptoris<sup>3</sup>, Daniel  
4 Kadobera<sup>1,2</sup>, Lilian Bulage<sup>1,2</sup>, Edirisa J. Nsubuga<sup>1</sup>, Peter Mudiope<sup>3</sup>, Alex R. Ario<sup>1,2</sup>

## 5 Institutional affiliations

6 <sup>1</sup>Uganda Public Health Fellowship Program, Kampala, Uganda

7 <sup>2</sup>Uganda National Institute of Public Health, Kampala, Uganda

8 <sup>3</sup>AIDS Control Program, Ministry of Health, Kampala, Uganda

9 \*Correspondence : Patience Mwine, +256777865638, pmwine@musph.ac.ug

10

## 11 Abstract

12 **Background:** Global studies indicate that sexual gender based violence (SGBV) may  
13 increase during pandemics including the COVID-19. The Mid-Eastern region in Uganda was  
14 of a concern due to high prevalence of intimate partner sexual violence among adolescent  
15 girls and young women (AGYW) (13% in 2016). Due to limited data, we investigated factors  
16 associated with SGBV among AGYW during the COVID-19 pandemic in Eastern Uganda,  
17 April 2022.

18 **Methods:** We line listed all AGYW 10-24 years who obtained SGBV services at ten high-  
19 volume health facilities from March 2020 to December 2021, the main COVID-19 period in  
20 Uganda. We conducted a case-control study among these AGYW. A case was  $\geq 1$  SGBV  
21 episode experienced by an AGYW aged 10-24 years residing in Tororo and Busia Districts.  
22 For every randomly-selected case from the health facility line list, we identified two  
23 neighbourhood-matched AGYW controls who reported no SGBV. We interviewed 108 and  
24 216 controls on socio-demographics, socio-economics, and SGBV experiences during

**NOTE:** This preprint reports new research that has not been certified by peer review and should not be used to guide clinical practice.

25 COVID-19. We conducted logistic regression to obtain adjusted odds ratios and confidence  
26 intervals.

27 **Results:** Among 389 SGBV cases, the mean age was 16.4 (SD± 1.6: range 10-24) years, and  
28 350 (90%) were 15-19 years. Among 108 cases interviewed, 79 (73%) reported forced sex.  
29 Most (73; 68%) knew the perpetrator. In multivariate analysis, self-reported SGBV before the  
30 COVID-19 period [aOR=5.8, 95%CI: 2.8-12] and having older siblings [aOR=1.9, 95%:CI  
31 1.1-3.4] were associated with SGBV during the period. Living with a family that provided all  
32 the basic needs was protective [aOR=0.42, 95%: CI 0.23-0.78].

33 **Conclusion:** Previous SGBV experiences and family dynamics, such as having older  
34 siblings, increased the odds of SGBV during the COVID-19 pandemic in Uganda.  
35 Conversely, a supportive family environment was protective. Identifying, supporting, and  
36 enacting protective interventions for existing SGBV victims and socioeconomically  
37 vulnerable AGYW could reduce the burden of SGBV during similar events.

38  
39 **Keywords: Sexual Gender-Based Violence, Adolescent Girls and Young Women,**  
40 **COVID-19**

41 **Word Count: 289**

## 44 **Introduction**

45 Sexual gender-based violence (SGBV) is defined as "any sexual act, attempt to obtain a  
46 sexual act, or other act directed against a person's sexuality using coercion, by any person  
47 regardless of their relationship to the survivor, in any setting" (1). SGBV is a significant  
48 public health concern with multifaceted consequences for adolescent girls and young women  
49 (AGYW), including increased risks of HIV transmission, mother-to-child HIV transmission,

50 unwanted pregnancies, school dropouts, mental health disorders and socio-economic  
51 difficulties (2).

52

53 In Uganda, approximately 22% of women aged 15-49 experience SGBV at some point in  
54 their lives (3). However, AGYW are disproportionately affected by sexual violence. The  
55 2018 Violence against Children Survey (VAC) revealed that one in three girls aged 18-24  
56 years experienced sexual violence during their childhood, while one in four girls age 13-17  
57 years reported recent sexual violence (past 12 months) (4). Women reporting SGBV receive  
58 essential services, including timely Post Exposure Prophylaxis (PEP) and emergency  
59 contraception within 72 hours, as well as the necessary medical attention for any injuries or  
60 wounds sustained (5). However, the implementation of COVID-19 restrictions aimed at  
61 controlling the pandemic resulted in disruptions in access to post violence essential services  
62 (6).

63

64 From March 2020 to January 2022 in Uganda, schools were closed as part of the COVID-19  
65 pandemic response. Anecdotal reports from Uganda Police and an analysis of national SGBV  
66 program data suggested that SGBV cases had increased during the COVID-19 pandemic,  
67 especially during the two lockdown periods in 2020 and 2021(7). Both the prolonged period  
68 spent out of school and the implementation of multiple lockdowns, leading to girls' exposure  
69 to perpetrators within homes and neighborhoods during times they would otherwise have  
70 been elsewhere, were suggested as possible causes (8). A notable 33% increase in teenage  
71 pregnancies during 2020 and 2021 compared to 2019 indicated a potential rise in sexual  
72 gender-based violence (SGBV) during the COVID-19 pandemic period; analysis of Health  
73 Information Management System HMIS data (P.M., unpublished data). The Mid-Eastern  
74 Region, known for highest prevalence of sexual violence among AGYW 15-24 years (13.3%)

75 according to Uganda Population-based HIV Impact Assessment (UPHIA) 2016 (9), was of  
76 particular concern . There was limited information on factors associated with SGBV among  
77 adolescent girls and young women during the COVID-19 pandemic. We evaluated SGBV  
78 services and determined the factors associated with SGBV among AGYW during the  
79 COVID-19 pandemic in Mid-Eastern Region to provide information for interventions and  
80 future prevention measures for SGBV.

81

## 82 **Methods**

### 83 **Study design and setting**

84 We employed a mixed-methods approach, including a descriptive, qualitative, and case-  
85 control study among AGYW aged 10-24 years in Tororo and Busia districts, Mid-Eastern  
86 Region. These two districts are in Eastern Uganda, bordering Kenya. Both have active trading  
87 activities and border points with many transit truck drivers. These districts were selected  
88 because they reported the highest number of teenage pregnancies during the COVID-19  
89 period in Mid-Eastern Region (10).

90

### 91 **Case definition and finding**

92 We selected ten high-volume health facilities providing SGBV care, including one district  
93 hospital, one Health Center IV, and three high-volume Health Center IIIs from each of the  
94 two districts. We abstracted health facility data for AGYW (aged 10-24 years) recorded in the  
95 SGBV register from March 2020 to December 2021 during 20th March to 2<sup>nd</sup> April, 2022.  
96 Health care workers record information for SGBV survivors who are identified through self-  
97 reporting or from routine screening for SGBV, including screening that occurs as part of HIV  
98 care and treatment clinics and in antenatal care clinics. We obtained information on the visit  
99 date, socio-demographic characteristics, and patient management, including HIV post-

100 exposure prevention (PEP), family planning, outcome, and follow-up. Additional information  
101 on PEP provision was obtained from the PEP registers.

102

### 103 **Descriptive epidemiology**

104 We described the SGBV cases by place and person and the quality of SGBV services  
105 received by the survivors. Using district sub-county population estimates (District records-  
106 un-published data) as the denominator, we computed SGBV incidence rates per 100  
107 individuals in each sub-county using health facility data. The numerator included recorded  
108 SGBV cases among AGYW aged 10-24 years from March 2020 to December 2021.

109

### 110 **Case-control study to identify factors associated with sexual gender-based violence** 111 **during the COVID pandemic period, Tororo and Busia District, Uganda**

112 The SGBV incidence rates (IR) among sub-counties ranged from 0.1% to 6%. Among the 11  
113 sub-counties with  $IR \geq 3\%$ , we randomly selected six (three from each district) to serve as  
114 sites for the case-control study. These included Mukuju, Western division, and Usukuru sub-  
115 counties from Tororo district and Masafu, Lumino, and Buyanga sub-counties from Busia  
116 District (Figure 1).

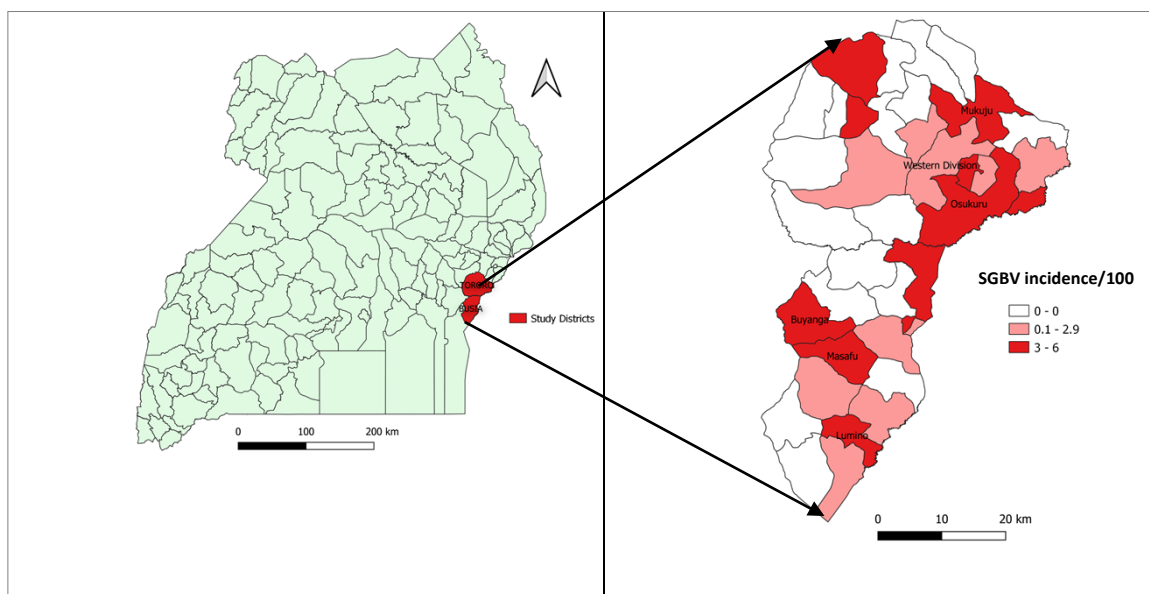

117

118 **Figure 1. Sexual gender-based violence incidence rate among adolescent girls and young**  
119 **women in Busia and Tororo Districts, March 2020-December 2021**

120

121 We conducted a neighbourhood-matched case-control study to determine factors associated  
122 with SGBV among AGYW during March 2020 to December 2021, covering the highest-  
123 burden phases of the COVID-19 pandemic in Uganda. We defined a case as an AGYW aged  
124 10-24 years who reported at least one episode of SGBV to any of 10 high-volume health  
125 facilities in Tororo and Busia Districts during this time. For every case, we identified two  
126 neighbourhood-matched AGYW controls who reported no SGBV during the same period,  
127 from 20th March to 2<sup>nd</sup> April, 2022.

128

129 We assumed a self-reported reduction in family income during the pandemic was a  
130 significant risk factor for SGBV with an odds ratio of 2 and 40% of controls exposed. At a  
131 ratio of 1:2 cases to controls and 80% power, we obtained a sample size of 324 (108 cases  
132 and 216 controls). Using a line list of SGBV cases from the ten health facilities, we randomly  
133 selected 108 SGBV cases for interviews. We visited the cases in the community for  
134 interviews with the help of social workers and community health workers. For every case, we  
135 identified two neighbourhood-matched control AGYW. The controls were identified from  
136 neighbour households of cases. We interviewed one control in each household. If more than  
137 one controls was available in a given household, we used a random number to select one for  
138 interviews.

139

140 We adopted the recent Uganda's Violence against Children (VAC) Survey (2018)  
141 questionnaire, (4) and tailored it to our study. We interviewed cases and controls to obtain  
142 information on socio-demographics, risk factors for SGBV, care and services received,  
143 economic activities undertaken during the COVID-19 period by the participant and their

144 immediate family place of residence before and during the COVID-19 period, school  
145 attendance before and during the COVID-19 period, household size, household members  
146 living in the house, household members' occupations, day and night-time activities of the  
147 case, parental supervision, and others. To determine the factors associated with SGBV, we  
148 conducted conditional logistic regression analysis.

149

### 150 **Key informant interviews to identify factors associated with SGBV during the pandemic**

151 We interviewed the six GBV focal persons who manage SGBV cases as key informants at the  
152 six facilities in which the focal person was present during data collection. Using a  
153 predesigned key informant guide that had open ended questions, we asked about possible root  
154 causes of increased SGBV cases in the region and explored challenges related to high rates of  
155 teenage pregnancies, management of SGBV during the pandemic, and availability of drugs  
156 such as emergency contraceptives and PEP.

157

158 The interviews were carefully recorded and transcribed, followed by a systematic content  
159 analysis approach. The transcriptions were coded to identify recurring themes, which were  
160 then organized into broader thematic categories. The results were summarized by extracting  
161 relevant information and including verbatim quotes to support the quantitative findings.

162

### 163 **Ethical approval and consent to participate**

164 The Uganda Public Health Fellowship Program under which this evaluation was conducted is  
165 part of the National Rapid Response Team, and has been granted permission by the Ministry  
166 of Health to access and analyse surveillance data in the District Health Information System-2  
167 and other data such as survey and field investigation data to inform decision making in the  
168 control and prevention of outbreaks and public health programming. Additionally, the MOH

169 has also granted the program permission to disseminate the information through scientific  
170 publications.

171 In agreement with the International Guidelines for Ethical Review of Epidemiological  
172 Studies by the Council for International Organizations of Medical Sciences (1991) and the  
173 Office of the Associate Director for Science, CDC/Uganda, it was determined that this  
174 activity was not human subject research and that its primary intent was public health practice  
175 or disease control activity (specifically, epidemic or endemic disease control activity). All  
176 experimental protocols were approved by the US CDC human subjects review board and the  
177 Uganda Ministry of Health and have been performed in accordance with the Declaration of  
178 Helsinki. This activity was reviewed by CDC and found consistent with applicable federal  
179 law and CDC policy. We obtained a CDC e-clearance (Project ID: 0900f3eb81e95e4d,  
180 Accession #: CGH-FETPT-2/17/22-95e4d) “All of the reviews have been completed for your  
181 project. You may now work on this project” on 4<sup>th</sup>, Mar, 2022.

182  
183 Written informed consent was obtained from the participants before the start of each  
184 interview including the health care workers and the interviewed AGYW. We obtained written  
185 informed consent from the parents and guardians of the AGYW that were below the age of 18  
186 years before interviews and assent from these girls. We also sought permission from the  
187 district health officials and heads of the health facilities. During data collection, respondents  
188 were assigned unique identifiers instead of names to protect their confidentiality.

189

## 190 **Results**

### 191 **Description of SGBV cases, Mid-Eastern Region, Uganda, March 2020-December 2021**

192 We identified 389 SGBV cases among AGYW at the ten selected health facilities in Tororo  
193 and Busia Districts from March 2020 to December 2021. Their mean age was 16.4 years



194 (SD± 1.61: range, 10-24 years) and most (350; 90%) were 15-19 years of age. Two thirds  
 195 (214; 67%) were pregnant at the time their SGBV event was recorded in the facility register.  
 196 Nearly half (180; 46%) presented to the facility >72 hours after the event. Among the 209  
 197 who presented within 72 hours, only 8 (4%) received PEP (Table 1).

198

199 **Table 1: Characteristics of sexual gender-based violence cases managed at health**

200 **facilities during the COVID-19 period in Mid-Eastern Region, 2020-2021**

| Variable                                                                        | n=389 | (%)   |
|---------------------------------------------------------------------------------|-------|-------|
| <b>Age</b>                                                                      |       |       |
| 10-14                                                                           | 25    | (6.4) |
| 15-19                                                                           | 350   | (90)  |
| 20-24                                                                           | 14    | (3.6) |
| <b>Marital status</b>                                                           |       |       |
| Married                                                                         | 198   | (51)  |
| Not married                                                                     | 191   | (49)  |
| <b>HIV test done</b>                                                            |       |       |
| Yes                                                                             | 321   | (83)  |
| No                                                                              | 65    | (17)  |
| <b>Followed up by HCW after initial visit at least once</b>                     |       |       |
| Yes                                                                             | 16    | (4.1) |
| No                                                                              | 373   | (96)  |
| <b>Followed up by HCW after initial visit at least 4 times (as recommended)</b> |       |       |
| Yes                                                                             | 0     | (0)   |
| No                                                                              | 389   | (100) |
| <b>Pregnant</b>                                                                 |       |       |
| Yes                                                                             | 214   | (67)  |
| No                                                                              | 107   | (33)  |
| <b>Time between event and presentation for care</b>                             |       |       |
| <24 hours                                                                       | 97    | (25)  |
| 24-72 hours                                                                     | 112   | (29)  |
| >72 hours                                                                       | 180   | (46)  |
| <b>PEP among person who presented &lt;72 hrs (n=209)</b>                        |       |       |
| Yes                                                                             | 8     | (3.8) |
| No                                                                              | 201   | (96)  |

201 \*HCW- Health care worker

202 **Description of sexual gender-based violence cases considered for the case-control study**

203 Of the 108 cases interviewed, 79 (73%) reported being physically forced into sex while 29

204 (27%) reported that they were pressured into sex through harassment and threats. Most (88;

205 82%) reported that the episode was their first SGBV experience during COVID-19 period.  
206 Among 73 (68%) who agreed to share information about the perpetrator, 29 (40%) reported it  
207 was a friend and 17 (23%) said it was the neighbour. The majority (71; 67%) reported to the  
208 health facility after >72 hours; of these, 42 (58%) said that they delayed reporting due to  
209 feelings of social stigma about their SGBV experience. The most reported adverse outcome  
210 from the episode was unwanted pregnancy (38; 35%) (Table 2).

211

212 **Table 2: Characteristics of sexual gender-based violence cases included in the case**  
 213 **control study during the COVID-19 period in Mid-Eastern Region, 2020-2021**

| Variable                                                                                                                  | N=108 | (%)   |
|---------------------------------------------------------------------------------------------------------------------------|-------|-------|
| <b>Type of SGBV</b>                                                                                                       |       |       |
| Physically forced sex                                                                                                     | 79    | (73)  |
| Pressured into sex through harassment and threats                                                                         | 29    | (27)  |
| <b>First time experience of SGBV during COVID-19</b>                                                                      | 88    | (82)  |
| <b>Time of Sexual event</b>                                                                                               |       |       |
| Day                                                                                                                       | 23    | (21)  |
| Evening                                                                                                                   | 21    | (19)  |
| Night                                                                                                                     | 44    | (40)  |
| Declined to answer                                                                                                        | 20    | (19)  |
| <b>Type of perpetrator (among 73 providing information)</b>                                                               |       |       |
| Friend                                                                                                                    | 29    | (40)  |
| Neighbor                                                                                                                  | 17    | (23)  |
| Relative                                                                                                                  | 9     | (12)  |
| Others                                                                                                                    | 18    | (25)  |
| <b>Where the incident occurred</b>                                                                                        |       |       |
| On the way somewhere                                                                                                      | 25    | (21)  |
| Friends place                                                                                                             | 25    | (23)  |
| Home                                                                                                                      | 26    | (24)  |
| Relative home                                                                                                             | 11    | (10)  |
| Workplace                                                                                                                 | 2     | (1.9) |
| Not comfortable to mention the place                                                                                      | 20    | (19)  |
| <b>Adverse outcomes</b>                                                                                                   |       |       |
| Unwanted pregnancy                                                                                                        | 38    | (35)  |
| Depression                                                                                                                | 20    | (19)  |
| Anxiety                                                                                                                   | 12    | (11)  |
| STI                                                                                                                       | 7     | (6.5) |
| Others                                                                                                                    | 14    | (13)  |
| <b>Reported they received emergency contraception</b>                                                                     | 35    | (32)  |
| <b>Time from SGBV event to presentation to health facility</b>                                                            |       |       |
| Immediately                                                                                                               | 18    | (27)  |
| 1-3 days                                                                                                                  | 18    | (27)  |
| >3 days                                                                                                                   | 72    | (67)  |
| <b>Self-reported they received PEP from health facility or other site (among 102 who provided a response)</b>             | 35    | (34)  |
| <b>Self-reported they received PEP from health facility or other site (among 36 who presented &lt;3 days after event)</b> | 20    | (56)  |
| <b>Reasons for reporting to the health facility &gt; 3 days (n=72)</b>                                                    |       |       |
| Social stigma                                                                                                             | 42    | (58)  |
| Fear of retaliation                                                                                                       | 13    | (18)  |
| Lack of awareness                                                                                                         | 13    | (18)  |
| Others                                                                                                                    | 4     | (5.6) |

214 \*PEP; Post Exposure Prophylaxis, STI: Sexually Transmitted Infection

215

216 **Factors associated with sexual gender-based violence among adolescent girls and young**  
217 **women during COVID-19, Tororo and Busia districts, Mid-Eastern Uganda**

218 In bivariate analysis, having older siblings [cOR=1.7, 95% CI: 1.04-2.8], ever being pregnant  
219 before the COVID-19 period [cOR=2.5, 95% CI: 1.6-4.0], ever being sexually violated  
220 before the COVID-19 period [cOR=8.1, 95% CI: 4.1-16], and ever being involved in sex  
221 work [cOR=3.4, 95% CI: 2.1-5.6] were associated with SGBV. In contrast, having a family  
222 that was able to provide all basic needs was protective [cOR=0.33, 95% CI: 0.20-0.56] (Table  
223 3). Age, being in school before COVID-19 period, level of education, ever having had  
224 children, knowledge and use of family planning, and family change in economic status during  
225 the COVID-19 period were not significantly associated with SGBV.

226

227 In multivariable analysis, experiencing sexual violence before COVID-19 [aOR=5.8, 95%  
228 CI: 2.8-12] and having older siblings [aOR=1.9, 95% CI: 1.1-3.4] remained significantly  
229 associated with SGBV during COVID-19 period. The family's ability to provide all basic  
230 needs [aOR=0.42, 95% CI: 0.23-0.78] was protective. While the odds of SGBV decreased  
231 with increasing age, the association was not significant (Table 3).

232

233

234

235

236

237

238

239 **Table 3: Characteristics of cases and controls and their association with Sexual Gender**  
 240 **Based Violence during the COVID-19 period in Mid-Eastern Region, 2020-2021**

| Characteristic                                        | Cases<br>(n=108) |       | Controls<br>(n=216) |       | Bivariate Analysis |             | Multivariate<br>Analysis |             |
|-------------------------------------------------------|------------------|-------|---------------------|-------|--------------------|-------------|--------------------------|-------------|
|                                                       | n                | (%)   | n                   | (%)   | cOR                | 95% CI      | aOR                      | 95% CI      |
| <b>Age in years</b>                                   |                  |       |                     |       |                    |             |                          |             |
| 10-14                                                 | 16               | (15)  | 47                  | (22)  | Ref                |             |                          |             |
| 15-19                                                 | 67               | (62)  | 107                 | (50)  | 1.8                | (0.97-3.5)  | 0.94                     | (0.44-2.03) |
| 20-24                                                 | 26               | (24)  | 61                  | (28)  | 1.3                | (0.60-2.6)  | 0.52                     | (0.20-1.3)  |
| <b>Has older sibling(s)</b>                           | 77               | (71)  | 126                 | (58)  | 1.7                | (1.04-2.8)  | 1.9                      | (1.1-3.4)   |
| <b>Ever pregnant before COVID-19 period</b>           | 63               | (58)  | 76                  | (35)  | 2.5                | (1.6-4.0)   | 1.7                      | (0.86-3.2)  |
| <b>Sexually violated before COVID-19 period</b>       | 40               | (37)  | 8                   | (3.7) | 8.1                | (4.1-16)    | 5.8                      | (2.8-12)    |
| <b>Ever involved in sex work</b>                      | 54               | (50)  | 47                  | (22)  | 3.4                | (2.1-5.6)   | 1.7                      | (0.9-3.2)   |
| <b>Family provides all basic needs</b>                | 63               | (58)  | 172                 | (80)  | 0.33               | (0.20-0.56) | 0.42                     | (0.23-0.78) |
| <b>Knows about family planning</b>                    | 58               | (54)  | 110                 | (51)  | 1.06               | (0.67-1.7)  | -                        | -           |
| <b>Ever used family planning</b>                      | 29               | (27)  | 51                  | (24)  | 1.1                | (0.66-1.9)  | -                        | -           |
| <b>Ever had children</b>                              | 44               | (41)  | 56                  | (26)  | 0.83               | (0.39-1.7)  | -                        | -           |
| <b>Stayed with during COVID-19</b>                    |                  |       |                     |       |                    |             |                          |             |
| Parent                                                | 69               | (64)  | 151                 | (70)  | Ref                | -           | -                        | -           |
| Friends/relatives                                     | 40               | (37)  | 64                  | (30)  | 1.3                | (1.04-1.6)  | -                        | -           |
| <b>Highest education level</b>                        |                  |       |                     |       |                    |             |                          |             |
| None                                                  | 3                | (2.8) | 2                   | (0.9) | Ref                | -           | -                        | -           |
| Primary                                               | 73               | (68)  | 130                 | (60)  | 0.37               | (0.06-2.2)  | -                        | -           |
| Secondary                                             | 32               | (30)  | 69                  | (32)  | 0.31               | (0.05-1.9)  | -                        | -           |
| Tertiary                                              | 0                | (0.0) | 6                   | (2.8) | 1                  | -           | -                        | -           |
| <b>In school before COVID-19</b>                      | 86               | (80)  | 182                 | (84)  | 0.64               | (0.35-1.2)  | -                        | -           |
| <b>Family economic status changed during COVID-19</b> | 87               | (80)  | 154                 | (77)  | 1.2                | (0.68-2.1)  | -                        | -           |

241

242

243

## 244 **Qualitative results**

245 Results from the key informant interviews supported these findings.

246 Most GBV focal persons reported that AGYW who experienced SGBV often presented to the  
247 health facility beyond the recommended 72 hours. In many cases, these survivors were only  
248 identified during their antenatal care visits, often due to pregnancies resulting from the SGBV  
249 incidents. Consequently, they were unable to receive PEP and emergency oral contraceptives,  
250 despite the availability of such medicines. The management of SGBV cases posed a  
251 significant challenge during the COVID-19 period, as expressed by one key informant: *"The*  
252 *management of the SGBV cases was a big challenge during the COVID-19 period. Most girls*  
253 *presented here very late, some already pregnant, and whenever you asked them why they*  
254 *never came early, they reported they feared the perpetrators. You had nothing to do for them*  
255 *apart from counseling" (Key Informant II).*

256

257 The key informant respondents' highlighted significant parenting issues during the COVID-  
258 19 period, noting that many young people had unrestricted movement due to school closures  
259 and were frequently seen walking at night. This lack of parental supervision and control was  
260 a concern, as it potentially exposed girls to high-risk situations that could contribute to sexual  
261 gender-based violence. One key informant stated, *"I think parents did not play a good role*  
262 *during the COVID-19 lockdown. You know children were very idle and had nothing to do.*  
263 *You could find a group of girls and boys walking and laughing in the evenings as if they had*  
264 *no chores at home. Also, in this community, it is common to find young people moving at*  
265 *night, and this is even worse when there is a party" (Key Informant IV).*

266

267 Five out of six GBV focal persons highlighted that the families faced challenges in meeting  
268 their basic needs. The COVID-19 pandemic led to widespread poverty due to disrupted  
269 businesses. Consequently, many parents were unable to provide adequate support to their  
270 families. The resulting lack of necessities such as food may have compelled young people  
271 including the AGYW to seek necessities from other sources. *Key informant IV stated,*  
272 *"During COVID-19, there was a lot of poverty due to disrupted businesses and closure of*  
273 *schools. As a result, most parents were unable to support their children. Such could have*  
274 *forced girls to look for necessities such as food and clothing from elsewhere"*

275

## 276 **Discussion**

277 During the COVID-19 period, sexual gender-based violence (SGBV) became a pervasive and  
278 often overlooked challenge, perpetuating a disturbing silence that hindered effective  
279 intervention and support to the survivors. Many reported cases were pregnant at the time their  
280 SGBV experience was recognized and recorded. Shockingly, close to half of the survivors  
281 delayed reporting their experiences, making them ineligible for timely access to Post  
282 Exposure Prophylaxis (PEP). Even among those who reported earlier, the utilization of PEP  
283 services remained alarmingly low. Previous experiences of sexual violence and having older  
284 siblings were found to increase the likelihood of SGBV, while having sufficient family  
285 resources was a protective factor. Key informant interviews highlighted delays in seeking  
286 post-violence services, parenting challenges, and the lack of basic necessities as contributing  
287 factors to SGBV among AGYW during the COVID-19 period. These findings underscore the  
288 pressing need for comprehensive interventions to address and prevent SGBV, particularly in  
289 times of crisis.

290

291 Our findings indicate that less than half (34%) of SGBV victims self-reported to have  
292 received PEP. The low uptake of PEP among the exposed persons raises concerns about their  
293 risk of HIV acquisition. PEP is a critical intervention that can significantly reduce the risk of  
294 HIV transmission after a potential exposure, such as sexual assault (11). These findings were  
295 in line with a study done in Uganda where analysis of health information system (HMIS)  
296 data revealed 18% reduction on PEP uptake despite the increased sexual violence reports  
297 during COVID-19 period (6). PEP is available in public and private health care facilities in  
298 Uganda and must be given within 72 hours of the event to be effective (12). Low PEP uptake  
299 raises significant concerns about the provision of appropriate healthcare services to survivors  
300 of SGBV during COVID-19 pandemic. We identified many missed opportunities for  
301 preventing HIV infection among AGYW who experienced SGBV in Mid-Eastern Region.  
302 Several pandemic-related factors such as movement restrictions, limitations in resources and  
303 personnel, shifting priorities, and changes in service delivery models (13) may have impacted  
304 the availability and accessibility of healthcare services, including PEP (14).  
305  
306 Even among the AGYW who presented early, few received PEP. However, even among  
307 those who received PEP, it was often inappropriately given, highlighting a knowledge gap on  
308 PEP use among the health care workers and the users. Due to data gaps in the SGBV health  
309 facility registers, we could not verify the appropriateness of PEP use for all reported  
310 incidents. Similar findings were noted in a study done in Uganda to compare post-rape care  
311 before and during COVID-19 using national Health Management Information System  
312 (HMIS) and Uganda Child Help Line (UCHL) data. In this study, 50% of cases received PEP  
313 beyond the recommended 72 hours (15). This highlights the need for flexible methods of  
314 service delivery to increase timely access and utilisation of PEP among SGBV survivors.  
315 These might include community based approaches such as “off-facility PEP medication



316 delivery” and “PEP hotlines” (16). These community-based approaches were piloted in rural  
317 populations in Kenya and Uganda; results showed increased uptake and completion of PEP in  
318 the population (16). Emphasizing PEP guidelines on use within 72 hours among health care  
319 workers may be necessary to facilitate more appropriate use since PEP effectiveness is time  
320 bound.

321

322 Interviews with the GBV focal persons, as well as the high rate of pregnancy among AGYW  
323 identified as SGBV survivors from the clinic registers, suggested that many AGYW  
324 presented because of their pregnancy rather than the SGBV event itself. AGYW cited fears of  
325 the perpetrator and stigma as reasons they did not present immediately. Given that many  
326 SGBV events will not result in pregnancy, the high frequency of pregnancy among SGBV  
327 survivors who do report suggests that the reports described in this paper are the tip of the  
328 iceberg. Many women who do not become pregnant because of the SGBV likely simply do  
329 not report. Fear of public stigma is a well-documented factor that hinders patients from  
330 accessing health care services (9,10). Unfortunately, social stigma related to SGBV is known  
331 to worsen physical and psychological health impacts (18) and may increase the risk of  
332 additional violence (19). Efforts are needed to support AGYW to report SGBV and enable  
333 adequate and timely care to prevent HIV and unwanted pregnancies. The UCHL 116, which  
334 allows reporting by phone, was found to be a more acceptable channel to report sexual  
335 violence than reporting at health facilities (20). UCHL was implemented by Ministry of  
336 Gender Labour and Social Development (MGLSD) to improve reporting of child abuse and  
337 sexual violence. However, there is still low awareness of the UCHL, and a need for more  
338 advocacy (20). Active case-finding for SGBV survivors may be necessary to ensure  
339 appropriate care and support to the affected persons.

340

341 Having experienced SGBV before the COVID-19 period was associated with SGBV during  
342 COVID-19. Repeated sexual violence during COVID-19 suggests that affected girls may be  
343 continually exposed to the same perpetrator(s). Other studies have also found that individuals  
344 who are sexually victimised were likely to be re-victimised (15, 16,17). Both psychosocial  
345 support and ways to protect the once identified survivors such as establishing peer support  
346 groups to create safe spaces for victims (20), economic empowerment initiatives, community  
347 mobilization (22) may be necessary to prevent repeated SGBV experiences. In addition, there  
348 is need to strengthen the parents’/guardians’ daughter relationship to enable the girl’s open up  
349 to parents in case of SGBV through evidence based interventions such as community  
350 parenting programs and whole family support programming (23) (24).

351

352 The association between having older siblings and an increased risk of sexual gender-based  
353 violence (SGBV) observed in our study was not clear. However, it may simply reflect a  
354 younger age of the SGBV victim compared to non-SGBV survivors; age was found to be  
355 negatively associated with SGBV in our study, with the odds of association decreasing as age  
356 increased. Other factors could be related to power dynamics (25) or older siblings having  
357 experienced or witnessed SGBV, perpetuating a cycle of violence within the family (26).  
358 Exposure to violence can impact their attitudes towards relationships and sexual behavior,  
359 potentially leading to higher incidences of SGBV among younger siblings (27).Interventions  
360 that promote healthy sibling relationships and fostering positive role modeling may be  
361 necessary to address SGBV. Nevertheless, further research is needed to gain a deeper  
362 understanding of the underlying mechanisms involved and provide a potential explanation for  
363 this association.

364 We found that having a family providing all the basic needs to AGYW was protective against  
365 SGBV during COVID-19. Unfortunately, as a result of COVID-19 measures like the closure

366 of bars, shops, saloons, and markets and movement restrictions (28), many families were  
367 unable to provide basic needs for their children (21, 22). Efforts to support vulnerable  
368 AGYW with basic needs like food, clothing, and shelter among others may be necessary  
369 during future pandemics or similar situations to prevent SGBV.

370

## 371 **Limitations**

372 Our study was subject to several limitations. Health facility data were incomplete, limiting  
373 what we could analyse. We found irregularities with documentation in health facility  
374 registers, especially information on dates of incidence and follow-up services, and data on  
375 repeated episodes of SGBV. We could not tell from the data if the persons who were offered  
376 PEP accepted or completed the dosage. In addition, information on the first point of care was  
377 missing, and thus we could not establish if the cases who were recorded as pregnant were  
378 identified only during their antenatal clinic visits. We used the health facility data to identify  
379 the cases, and thus our data certainly represent an underestimate of the problem as well as  
380 reflecting possible bias if the survivors who did not present to the facility differ from those  
381 who do. Also, given the sensitivity of the subject and self-reporting of the data, some cases  
382 did not respond to questions related to the perpetrator resulting into potential bias.

## 383 **Conclusion**

384 Sexual gender-based violence negatively affected the lives of many adolescent girls and  
385 women during the COVID-19 pandemic. Most survivors did not present in time for HIV  
386 exposure prophylaxis and therefore efforts to improve access to services through community  
387 education and engagement with AGYW is key for PEP uptake when needed. Public health  
388 programs in the future may need to focus on identifying or supporting known survivors of

389 SGBV and those who are socioeconomically vulnerable and identifying approaches to protect  
390 them, especially during school closures or other events that leave them close to home.

### 391 **Availability of data and materials**

392 The datasets upon which our findings are based belong to the Uganda Public Health  
393 Fellowship Program, Ministry of Health, Uganda. For confidentiality reasons, the datasets are  
394 not publicly available. However, the data sets can be made available upon reasonable request  
395 from the corresponding author (pmwine@musph.ac.ug) and with permission from the  
396 Uganda Public Health Fellowship Program.

397

### 398 **List of abbreviations**

399 **SGBV**; Sexual Gender-Based Violence, **GBV**; Gender-Based Violence, **AGYW**; Adolescent  
400 Girls and Young Women, **UPHIA**; Uganda Population Impact Assessment, **DHIS2**; District  
401 Health Information System, **PEP**; Post Exposure Prophylaxis, **VAC.**; Violence Against  
402 Children **MoH**; Ministry of Health, **COVID-19**: Corona Virus Disease

403

### 404 **Disclaimer**

405 The findings and conclusions in this report are those of the author(s) and do not necessarily  
406 represent the official position of the U.S. Centers for Disease Control and Prevention.

### 407 **Competing interests**

408 The authors declare they have no competing interests.

### 409 **Funding**

410 This work was funded by the Cooperative Agreement-Provision of Comprehensive  
411 HIV/AIDS services and Developing National Capacity to manage HIV/AIDS Programs in the  
412 Republic of Uganda under the President's Emergency Plan for AIDS Relief (Cooperative  
413 Agreement number U2GGH001353-04) through the United States Centers for Disease

414 Control and Prevention to Uganda Ministry of Health through Makerere University School of  
415 Public Health. The funder had no role in the study's design, data collection, or decision to  
416 publish the work.

#### 417 **Authors' contributions**

418 P.M took the lead in conceptualizing the study idea, data analysis, writing and editing of the  
419 manuscript. P.M, J.C, contributed to the development of the proposal and data collection  
420 tools, and P.M, B.K, RM contributed to epidemiological data collection and formal analysis  
421 of data, P.M, R.M, B.K, D.K, L.B, A.R.A contributed to interpretation of findings  
422 investigation, writing, editing, and reviewing of the manuscript. All authors contributed to the  
423 write-up and read and approved the final manuscript.

#### 424 **Corresponding author**

425 Correspondence to [Patience Mwine](#).

#### 426 **Acknowledgments**

427 We appreciate the health facilities and the data collection teams, especially the health facility  
428 GBV focal persons, for the support rendered to interview the cases. We commend the AGYW  
429 who participated and shared their experiences to inform the factors associated with SGBV  
430 during the COVID-19 period. I acknowledge Julie R. Harris and Rose Apondi for their  
431 technical support rendered to me during the inception of the idea and review of the  
432 manuscript.

433

#### 434 **References**

- 435 1. Violence against women [Internet]. [cited 2021 Dec 20]. Available from:  
436 <https://www.who.int/westernpacific/health-topics/violence-against-women>
- 437 2. WHO [Internet]. World Health Organization; [cited 2022 Jan 6]. WHO | Gender-based  
438 violence in health emergencies. Available from: [http://www.who.int/health-](http://www.who.int/health-cluster/about/work/task-teams/genderbasedviolence/en/)  
439 [cluster/about/work/task-teams/genderbasedviolence/en/](http://www.who.int/health-cluster/about/work/task-teams/genderbasedviolence/en/)

- 440 3. UBOS, Uganda. Uganda Demographic Health Survey. 2016.
- 441 4. Ministry of Gender, Uganda. Violence Against Children Survey 2018. 2018.
- 442 5. Interagency-GBV-Case-Management-Guidelines\_Final\_2017.pdf [Internet]. [cited 2022  
443 Jan 21]. Available from: [http://www.gbvims.com/wp/wp-content/uploads/Interagency-  
444 GBV-Case-Management-Guidelines\\_Final\\_2017.pdf](http://www.gbvims.com/wp/wp-content/uploads/Interagency-GBV-Case-Management-Guidelines_Final_2017.pdf)
- 445 6. Apondi R. Gender-based violence shadows COVID-19: Increased sexual violence, HIV  
446 exposure and teen pregnancy among girls and women in Uganda [Internet]. 2021 [cited  
447 2023 Jul 4]. Available from: <https://theprogramme.ias2021.org/Abstract/Abstract/2172>
- 448 7. aidsmap.com [Internet]. [cited 2022 Jan 6]. Sexual violence against women and girls in  
449 Uganda increased during the COVID-19 pandemic. Available from:  
450 [https://www.aidsmap.com/news/jul-2021/sexual-violence-against-women-and-girls-  
451 uganda-increased-during-covid-19-pandemic](https://www.aidsmap.com/news/jul-2021/sexual-violence-against-women-and-girls-uganda-increased-during-covid-19-pandemic)
- 452 8. The Nordic Africa Institute. Covid reveals flaws in the protection of girls in Uganda :  
453 Recommendations on how to tackle sexual and gender-based violence - Uganda  
454 [Internet]. 2021. Available from: [https://reliefweb.int/report/uganda/covid-reveals-flaws-  
455 protection-girls-uganda-recommendations-how-tackle-sexual-and](https://reliefweb.int/report/uganda/covid-reveals-flaws-protection-girls-uganda-recommendations-how-tackle-sexual-and)
- 456 9. Ministry of Health, Uganda. Uganda Population-based HIV Impact Assessment (UPHIA)  
457 2016-2017: Final Report. 2019.
- 458 10. Independent T. Over 47,000 girls impregnated in Bukedi during COVID [Internet]. The  
459 Independent Uganda: 2021 [cited 2022 Aug 23]. Available from:  
460 <https://www.independent.co.ug/over-47000-girls-impregnated-in-bukedi-during-covid/>
- 461 11. Ministry of Health, Uganda. The National policy guidelines on Post Exposure  
462 Prophylaxis for HIV, Hepatitis B and Hepatitis C. 2007.
- 463 12. World Health Organization, Organization IL. Post-exposure prophylaxis to prevent HIV  
464 infection : joint WHO/ILO guidelines on post-exposure prophylaxis (PEP) to prevent  
465 HIV infection [Internet]. World Health Organization; 2007 [cited 2022 Jul 21]. Available  
466 from: <https://apps.who.int/iris/handle/10665/43838>
- 467 13. Kabwama SN, Wanyenze RK, Kiwanuka SN, Namale A, Ndejjo R, Monje F, et al.  
468 Interventions for Maintenance of Essential Health Service Delivery during the COVID-  
469 19 Response in Uganda, between March 2020 and April 2021. *Int J Environ Res Public*  
470 *Health*. 2022 Sep 30;19(19):12522.
- 471 14. Perceived impacts of COVID-19 responses on routine health service delivery in Liberia  
472 and UK: cross-country lessons for resilient health systems for equitable service delivery  
473 during pandemics | *BMC Health Services Research* | Full Text [Internet]. [cited 2023 Jul  
474 17]. Available from:  
475 <https://bmchealthservres.biomedcentral.com/articles/10.1186/s12913-023-09162-8>
- 476 15. Apondi R, Awor A, Nelson L, Cheptoris J, Ngabirano F, Egbulem CD, et al. Gender-  
477 based violence shadows COVID-19: Increased sexual violence, HIV exposure and teen  
478 pregnancy among girls and women in Uganda. *Journal of the International AIDS Society*.  
479 2021 Jul 1;24(S4):53–5.

- 480 16. Ayieko J, Petersen ML, Kabami J, Mwangwa F, Opel F, Nyabuti M, et al. Uptake and  
481 outcomes of a novel community-based HIV post-exposure prophylaxis (PEP) programme  
482 in rural Kenya and Uganda. *Journal of the International AIDS Society*.  
483 2021;24(6):e25670.
- 484 17. Subu MA, Wati DF, Netrida N, Priscilla V, Dias JM, Abraham MS, et al. Types of  
485 stigma experienced by patients with mental illness and mental health nurses in Indonesia:  
486 a qualitative content analysis. *International Journal of Mental Health Systems*. 2021 Oct  
487 18;15(1):77.
- 488 18. Schmitt S, Robjant K, Elbert T, Koebach A. To add insult to injury: Stigmatization  
489 reinforces the trauma of rape survivors – Findings from the DR Congo. *SSM - Population*  
490 *Health*. 2021 Mar 1;13:100719.
- 491 19. Barnett JP, Maticka-Tyndale E, Kenya T. Stigma as Social Control: Gender-Based  
492 Violence Stigma, Life Chances, and Moral Order in Kenya. *Social Problems*.  
493 2016;63(3):447–62.
- 494 20. Gumbie, et, al. GLI. 2020 [cited 2022 Jul 19]. Child Abuse — Research: Sauti 116  
495 Uganda Child Helpline, A rapid assessment of the gaps in the reporting system and  
496 public’s knowledge and awareness of the service. Available from:  
497 <https://www.globallivingston.org/dir/research/tag/Child+Abuse>
- 498 21. Mohammed F. The Repetition Compulsion: Why Rape Victims Are More Likely To Be  
499 Assaulted Again [Internet]. *Girls’ Globe*. 2015 [cited 2022 Jun 13]. Available from:  
500 [https://www.girlsglobe.org/2015/08/04/the-repetition-compulsion-why-rape-victims-are-](https://www.girlsglobe.org/2015/08/04/the-repetition-compulsion-why-rape-victims-are-more-likely-to-be-assaulted-again/)  
501 [more-likely-to-be-assaulted-again/](https://www.girlsglobe.org/2015/08/04/the-repetition-compulsion-why-rape-victims-are-more-likely-to-be-assaulted-again/)
- 502 22. Daruwalla N, Machchhar U, Pantvaidya S, D’Souza V, Gram L, Copas A, et al.  
503 Community interventions to prevent violence against women and girls in informal  
504 settlements in Mumbai: the SNEHA-TARA pragmatic cluster randomised controlled  
505 trial. *Trials*. 2019 Dec 17;20(1):743.
- 506 23. Daniel et al. A Ugandan Parenting Programme to Prevent Gender-Based Violence:  
507 Description and Formative Evaluation [Internet]. [cited 2022 Sep 9]. Available from:  
508 <https://journals.sagepub.com/doi/full/10.1177/10497315211056246>
- 509 24. Opportunities and challenges in preventing violence against adolescent girls through  
510 gender transformative, whole-family support programming in Northeast Nigeria |  
511 *Conflict and Health* | Full Text [Internet]. [cited 2023 Jul 17]. Available from:  
512 <https://conflictandhealth.biomedcentral.com/articles/10.1186/s13031-022-00458-w>
- 513 25. Morrongiello BA, Bradley MD. Sibling power: influence of older siblings’ persuasive  
514 appeals on younger siblings’ judgements about risk taking behaviours. *Inj Prev*. 1997  
515 Mar;3(1):23–8.
- 516 26. Gebrie S, Wasihun Y, Abegaz Z, Kebede N. Gender-based violence and associated  
517 factors among private college female students in Dessie City, Ethiopia: mixed method  
518 study. *BMC Women’s Health*. 2022 Dec 12;22(1):513.
- 519 27. Tantu T, Wolka S, Gunta M, Teshome M, Mohammed H, Duko B. Prevalence and  
520 determinants of gender-based violence among high school female students in Wolaita

521 Sodo, Ethiopia: an institutionally based cross-sectional study. BMC Public Health. 2020  
522 Apr 21;20(1):540.

523 28. AfricaNews. Africanews. 2021 [cited 2022 May 21]. Uganda imposes another lockdown:  
524 What are the restrictions? Available from:  
525 [https://www.africanews.com/2021/06/07/uganda-imposes-another-lockdown-what-are-](https://www.africanews.com/2021/06/07/uganda-imposes-another-lockdown-what-are-the-restrictions/)  
526 [the-restrictions/](https://www.africanews.com/2021/06/07/uganda-imposes-another-lockdown-what-are-the-restrictions/)

527 29. Danish Refugee Council. Uganda Cash Consortium stories: Basic needs approach  
528 implementation in Imvepi, Rhino Camp & Nakivale refugee settlements - Uganda |  
529 ReliefWeb [Internet]. [cited 2022 May 21]. Available from:  
530 [https://reliefweb.int/report/uganda/uganda-cash-consortium-stories-basic-needs-](https://reliefweb.int/report/uganda/uganda-cash-consortium-stories-basic-needs-approach-implementation-imvepi-rhino-camp)  
531 [approach-implementation-imvepi-rhino-camp](https://reliefweb.int/report/uganda/uganda-cash-consortium-stories-basic-needs-approach-implementation-imvepi-rhino-camp)

532
